# Supplementary material
Source: PubMed Central journal article supplement (PMC6237228)
Supplement: jciinsight-3-120493-s135.pdf [file jciinsight-3-120493-s135.pdf]

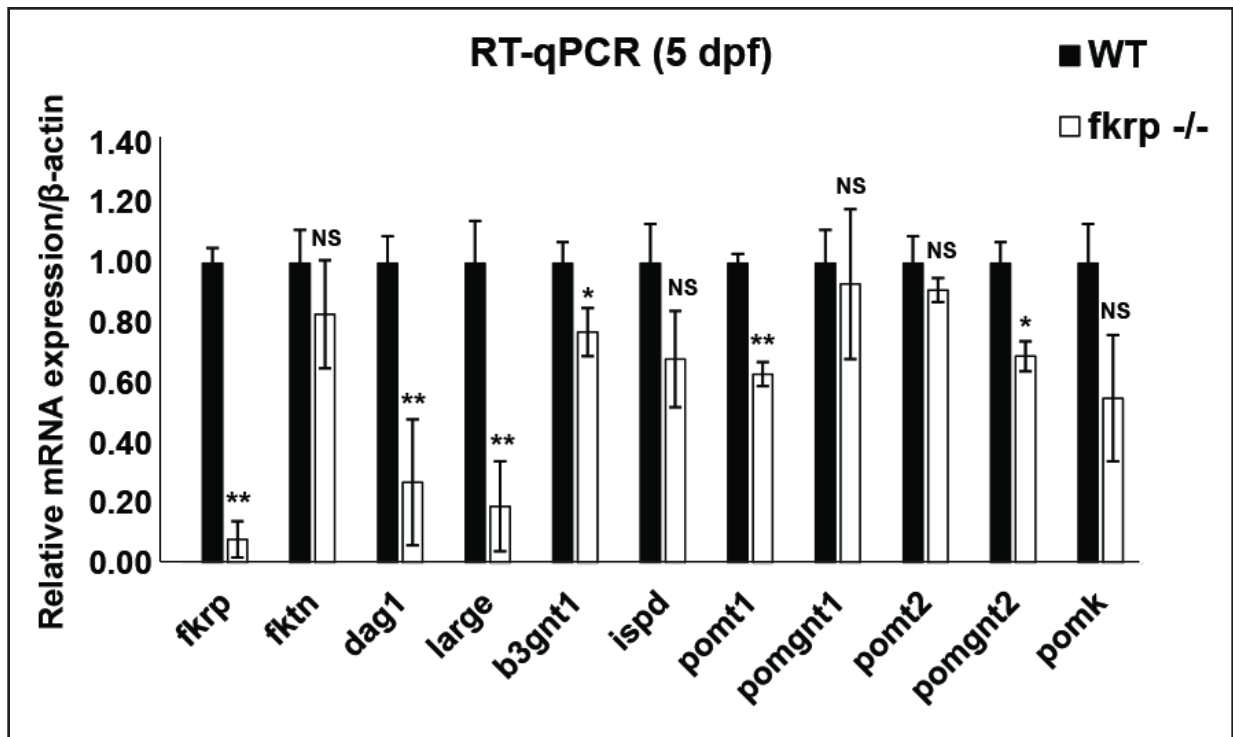

Supplemental Figure 2. Real time qPCR of mRNA expression levels of glycosyltransferase proteins in the FKR mutant zebrafish.

Supplemental Figure 3

| <b>Gene</b>    | <b>Primer Sequence (5' to 3') (Forward)</b> | <b>Primer Sequence (5' to 3') (Reverse)</b> |
|----------------|---------------------------------------------|---------------------------------------------|
| atf4a          | CCGGGAATCATGGCAGTGTA                        | GAGAAGCTGCGGTATTTGCG                        |
| atf4b          | TGACCCTCTGCGGTCAATTC                        | ACGAATGATCTTCACCACTGTCT                     |
| atf6           | TGTGCCCAAGGTTTCCATT                         | GAGATGGGTCTGTCCTGTGC                        |
| atf6b          | GATCCTGCAGAGCGTACCTG                        | CATGCTGGGAGATAACGGCT                        |
| hspa5          | CAAAGTTTATGAGGGCGAGCG                       | CCGGTTCCTGGTCGTTGGTAA                       |
| ern1           | TGGTGGAGTCACAGTGGTCT                        | TTGGGATCCGGGAGAAATGC                        |
| eif2ak3        | GGGCTCAGGCTGTTTGGTAT                        | TACGTGGTGAGGGATTTGCC                        |
| xbp1           | GAAAACAGAGCGCTTCGACC                        | ACTTGCTGTTCCAACCTCCCC                       |
| fkrp           | ATTATGTCTCGCGGGCTCAG                        | CAACCATGCTTCCACCAACG                        |
| fktn           | ACAGGCCTGACATCATTCCG                        | ATCCTCCGTCTCACAGGGAA                        |
| dag1           | CGATCTATTTCTCCGAGGTCTT                      | ACCACAAGAGTCCTGTCCCA                        |
| large          | GCTGGACGCTCAGGAGTATG                        | TCATTGTTTTGCAGTCCGA                         |
| b3gnt1         | ATCAGCCAGGCTTGTGAGCTT                       | AGAGGATTCGGTTC TTGCGG                       |
| ispd           | GCTTAAGGAGCGTCATGGGA                        | TCCAAGGGCCTTTGCGTCTC                        |
| pomt1          | CTAAAAGACCGCGCATGTGG                        | CATCAAACACTACAGCTTTGGGA                     |
| pomgnt1        | TACTCTAGCCGCTCCAAGGT                        | ATGACATGACCTGTGGCCTG                        |
| pomt2          | CCAAATGGGGATGGGAGCAA                        | AGTTAATGGGCCAGTGCCAG                        |
| pomgnt2        | TGGTAGAATACGCGCGACTG                        | GCTCCACCTGTGGGAAAGG                         |
| pomk           | CATGCAACCTGGTTAAGATGTCA                     | AAGTGCGGAGGAGGACATTG                        |
| $\beta$ -actin | CCCAGACATCAGGGAGTGAT                        | CACCGATCCAGACGGAGTAT                        |

## Supplemental Figure 4

| Antibody Name                       | Source                                  | Species and Type   | Dilution |
|-------------------------------------|-----------------------------------------|--------------------|----------|
| fkp (zebrafish)                     | Kunkel Lab (Kawahara et al., HMG, 2010) | rabbit polyclonal  | 1:500    |
| FKRP E4 (human)                     | Santa Cruz Biotechnology                | mouse monoclonal   | 1:1000   |
| glycosylated $\alpha$ -dag1 (IH6C4) | Developmental Studies Hybridoma Bank    | mouse monoclonal   | 1:1000   |
| $\beta$ -dag1 (7D11)                | Developmental Studies Hybridoma Bank    | mouse monoclonal   | 1:1000   |
| laminin (L9393)                     | Sigma-Aldrich                           | rabbit polyclonal  | 1:2500   |
| $\beta$ -actin (AC-15)              | Sigma-Aldrich                           | mouse monoclonal   | 1:5000   |
| anti-mouse IgG HRP-conjugated       | Cell Signaling Technology               | secondary antibody | 1:2500   |
| anti-rabbit IgG HRP-conjugated      | Cell Signaling Technology               | secondary antibody | 1:2500   |
| goat anti-mouse IgM HRP-conjugated  | Santa Cruz Biotechnology                | secondary antibody | 1:5000   |
